# Supplementary material for: Practical strategies to mitigate ruminant greenhouse gas emissions
Source: Research Square preprint supplement (doi:10.21203/rs.3.rs-179004/v1), 2021-02-04
Supplement: Supplementary file 1 [file 83ae884ff9fd7aca1fd14330.xlsx]

## Sheet: Supplementary Tables
Supplementary Table 1 |Grouping regions based on similarities of IPCC climate zones, humidity regimes and soil type. Area indicates the area (ha) in each region with either a tropical to warm temperate climate, moist to wet humidity, and any soil type; or a cool temperate and moist regime with a low activity clay (LAC) soil. (%) indicates the percentage of area with a silvopastoral potential from…								Supplementary Table 2 | Mitigation effect of all strategies (CO2eq Tg) from 2020 to 2050.
								Strategy	Year	Africa N/S	Africa C/E/W	America N	America C/S	Asia C/SE/E	Asia W	Asia S	Europe	Oceania	World
FAO Region	Region	IPCC Climate/Humidity/Soil*	Area ha (%)	Environmental descriptor				All strategies	2020	25.4518	81.7966	139.611	173.576	69.8191	20.7101	209.919	42.32	54.2102	817.413
Northern Africa	Africa N/S	WT/D/HAC	0	-				All strategies	2021	25.8217	80.5284	132.153	174.685	60.9082	21.2289	209.803	38.8471	53.1053	797.08
Southern Africa		WT/D/No dominant						All strategies	2022	17.6834	53.8845	84.4626	113.656	37.733	14.0139	136.219	23.3055	34.5417	515.5
Central Africa	Africa C/E/W	Tr/M and D/LAC	101,693 (45)	Tr/M /HAC				All strategies	2023	17.9298	56.0805	83.9553	114.941	36.6583	14.365	137.348	21.8172	34.8944	517.99
Eastern Africa		Tr/M and D/HAC and LAC						All strategies	2024	18.1801	58.3822	83.4482	116.247	35.5839	14.7249	138.487	20.3678	35.2512	520.673
Western Africa		Tr/M and D/HAC						All strategies	2025	18.4343	60.7942	82.9413	117.575	34.5097	15.0938	139.637	18.9559	35.6119	523.553
North America	America N	WT to B/D and M/HAC	265,173 (30)	CT/D/HAC				All strategies	2026	18.6926	63.1229	82.0512	118.635	32.2645	15.472	140.758	17.0657	35.9575	524.02
Central America/Caribbean	America C/S	Tr/ W and M/LAC	161,452 (85)	Tr/W/LAC				All strategies	2027	18.9549	65.5717	81.1613	119.717	30.0194	15.8596	141.89	15.2101	36.3073	524.691
South America		Tr/ W and M/LAC and HAC						All strategies	2028	19.2214	68.1462	80.2716	120.823	27.7747	16.2569	143.032	13.3875	36.6612	525.574
Central Asia	Asia C/SE/E	WT to C/D/HAC	460,370 (50)	WT/M/HAC				All strategies	2029	19.4921	70.8516	79.382	121.951	25.5301	16.6642	144.184	11.5968	37.0194	526.672
Eastern Asia		WT to C/D and M/HAC						All strategies	2030	19.7671	73.694	64.0511	101.252	23.2858	17.0817	145.347	6.82814	30.924	482.231
South-Eastern Asia		Tr to WT/W and M/LAC						All strategies	2031	20.0464	76.6793	63.1829	102.127	21.0418	17.5096	146.52	5.21766	31.2213	483.546
Western Asia	Asia W	Tr to WT/D/HAC	0	-				All strategies	2032	20.3301	79.8137	62.3149	103.021	18.7979	17.9483	147.705	3.63049	31.5222	485.084
Southern Asia	Asia S	Tr to WT/D and M/HAC	34,831(30)	WT/D/HAC				All strategies	2033	20.6183	83.104	61.447	103.937	16.5543	18.3979	148.9	2.06569	31.8267	486.85
Eastern Europe	Europe	CT/M/HAC	184,323 (16)	Tr/D/HAC				All strategies	2034	20.9111	86.5569	60.5793	104.872	14.311	18.8588	150.106	0.522369	32.1349	488.852
Northern Europe		CT/M/Spodic						All strategies	2035	21.2085	90.1796	59.7117	105.829	4.9793	19.3313	125.217	-1.00034	32.4469	457.904
Southern Europe		WT/D and M/HAC						All strategies	2036	21.5106	93.9797	58.8442	106.807	2.71934	19.8156	126.222	-2.50325	32.7626	460.158
Western Europe		WT to C/M/HAC and LAC						All strategies	2037	21.8175	97.9649	57.9769	107.807	0.459571	20.312	127.235	-3.98717	33.0821	462.668
Oceania	Oceania	Tr to WT/D and M/HAC and Sandy	15,856 (8)	WT/M/HAC				All strategies	2038	22.1292	102.143	57.1098	108.828	-1.8	20.8209	128.258	-5.45285	33.4055	465.442
								All strategies	2039	22.4459	106.524	56.2428	109.871	-4.05936	21.3425	129.291	-6.90102	33.7328	468.489
*HAC and LAC, high and low activity clay; WT, Warm Temperate; T, Tropical; B, Boreal; C, Cool; CT, Cool Temperate, M, Moist; W, Wet; D, Dry.								All strategies	2040	19.2606	90.8757	55.3759	110.937	-6.31853	18.1268	130.333	-8.33238	34.064	444.322
								All strategies	2041	19.5316	94.8337	54.5859	112.084	-12.0913	18.5809	131.392	-9.64478	34.403	443.674
								All strategies	2042	19.8069	99.0615	53.9493	113.37	-12.0075	19.0464	132.476	-10.736	34.7537	449.72
								All strategies	2043	20.0866	103.567	53.4662	114.796	-11.9235	19.5236	133.585	-11.6067	35.1162	456.61
								All strategies	2044	20.3707	108.36	53.1366	116.361	-11.8393	20.0127	134.719	-12.2575	35.4905	464.355
								All strategies	2045	20.6592	113.449	52.9605	118.068	-11.7549	20.5141	135.879	-12.6888	35.8766	472.962
								All strategies	2046	20.9523	118.804	52.8611	119.856	-11.6703	21.028	137.056	-13.0042	36.2707	482.154
								All strategies	2047	21.2501	124.395	52.762	121.67	-11.5855	21.5548	138.243	-13.307	36.6691	491.652
								All strategies	2048	21.5526	130.233	52.6629	123.508	-11.5004	22.0948	139.44	-13.5977	37.0718	501.466
								All strategies	2049	21.8598	136.329	52.564	125.372	-11.4152	22.6484	140.648	-13.8767	37.4788	511.608
								All strategies	2050	22.1719	142.693	52.4653	127.261	-11.3298	23.2158	141.866	-14.1445	37.8902	522.089
								Efficient animals	2020	23.1733	77.3162	132.729	172.595	61.9301	20.7101	208.059	41.0028	52.5592	790.075
								Efficient animals	2021	23.5416	80.7269	132.536	174.975	62.0795	21.2289	209.841	39.3613	53.1245	797.415
								Efficient animals	2022	23.9158	84.288	132.344	177.388	62.2291	21.7608	211.639	37.7855	53.6959	805.046
								Efficient animals	2023	24.2959	88.0063	132.151	179.835	62.3792	22.3059	213.452	36.2728	54.2735	812.971
								Efficient animals	2024	24.6821	91.8886	131.959	182.315	62.5296	22.8648	215.28	34.8206	54.8572	821.197
								Efficient animals	2025	25.0744	95.9421	131.767	184.829	62.6803	23.4376	217.124	33.4266	55.4473	829.729
								Efficient animals	2026	25.4729	100.174	131.575	187.378	62.8315	24.0248	218.984	32.0884	56.0437	838.573
								Efficient animals	2027	25.8778	104.594	131.384	189.962	62.9829	24.6266	220.86	30.8038	56.6465	847.738
								Efficient animals	2028	26.2891	109.208	131.193	192.582	63.1348	25.2436	222.752	29.5706	57.2557	857.228
								Efficient animals	2029	26.7069	114.025	131.002	195.238	63.287	25.876	224.661	28.3867	57.8716	867.054
								Efficient animals	2030	27.1314	119.055	116.422	176.158	63.4396	26.5243	226.585	24.2528	52.0597	831.628
								Efficient animals	2031	27.5626	124.307	116.253	178.587	63.5926	27.1888	228.526	23.2818	52.6196	841.919
								Efficient animals	2032	28.0007	129.791	116.084	181.05	63.7459	27.8699	230.484	22.3498	53.1856	852.56
								Efficient animals	2033	28.4457	135.516	115.915	183.547	63.8996	28.5682	232.458	21.455	53.7577	863.563
								Efficient animals	2034	28.8978	141.494	115.746	186.078	64.0537	29.2839	234.45	20.5961	54.3359	874.936
								Efficient animals	2035	29.3571	147.736	115.578	188.644	57.1452	30.0175	210.448	19.7715	54.9203	853.618
								Efficient animals	2036	29.8237	154.253	115.41	191.246	57.283	30.7695	212.251	18.98	55.511	865.527
								Efficient animals	2037	30.2977	161.058	115.242	193.883	57.4211	31.5404	214.069	18.2201	56.1081	877.84
								Efficient animals	2038	30.7793	168.163	115.075	196.557	57.5595	32.3305	215.903	17.4907	56.7116	890.569
								Efficient animals	2039	31.2685	175.581	114.907	199.268	57.6983	33.1405	217.752	16.7905	57.3216	903.728
								Efficient animals	2040	28.2712	163.161	114.74	202.016	57.8374	30.234	219.618	16.1183	57.9381	889.933
								Efficient animals	2041	28.7206	170.358	114.573	204.802	57.9769	30.9914	221.499	15.473	58.5613	902.956
								Efficient animals	2042	29.1771	177.874	114.407	207.626	58.1167	31.7678	223.397	14.8536	59.1912	916.409
								Efficient animals	2043	29.6408	185.72	114.24	210.489	58.2568	32.5637	225.31	14.2589	59.8278	930.308
								Efficient animals	2044	30.1119	193.913	114.074	213.392	58.3973	33.3795	227.241	13.6881	60.4713	944.668
								Efficient animals	2045	30.5905	202.467	113.908	216.335	58.5381	34.2158	229.187	13.1401	61.1217	959.504
								Efficient animals	2046	31.0767	211.399	113.742	219.318	58.6792	35.073	231.151	12.614	61.7791	974.832
								Efficient animals	2047	31.5706	220.724	113.577	222.343	58.8207	35.9516	233.131	12.109	62.4436	990.671
								Efficient animals	2048	32.0724	230.461	113.412	225.409	58.9625	36.8523	235.128	11.6243	63.1153	1007.04
								Efficient animals	2049	32.5822	240.628	113.247	228.518	59.1047	37.7756	237.142	11.1589	63.7941	1023.95
								Efficient animals	2050	33.1	251.243	113.082	231.669	59.2472	38.7219	239.174	10.7122	64.4803	1041.43
								Silvopasture	2020	2.27846	4.48041	6.88125	0.98093	7.88897	1.47e-05	1.86021	1.31714	1.65096	27.3383
								Silvopasture	2021	2.28006	-0.198499	-0.38333	-0.290904	-1.17129	1.47e-05	-0.038266	-0.514175	-0.019225	-0.335611
								Silvopasture	2022	2.28165	-0.396999	-0.76666	-0.581809	-2.34257	1.47e-05	-0.076533	-1.02835	-0.03845	-2.9497
								Silvopasture	2023	2.28325	-0.595498	-1.14999	-0.872713	-3.51386	1.47e-05	-0.114799	-1.54252	-0.057674	-5.56379
								Silvopasture	2024	2.28485	-0.793998	-1.53332	-1.16362	-4.68514	1.47e-05	-0.153065	-2.0567	-0.076899	-8.17788
								Silvopasture	2025	2.28645	-0.992497	-1.91665	-1.45452	-5.85643	1.47e-05	-0.191332	-2.57087	-0.096124	-10.792
								Silvopasture	2026	2.28805	-1.3895	-2.68331	-2.03633	-8.199	1.47e-05	-0.267864	-3.59922	-0.134573	-16.0217
								Silvopasture	2027	2.28965	-1.78649	-3.44997	-2.61814	-10.5416	1.47e-05	-0.344397	-4.62757	-0.173023	-21.2515
								Silvopasture	2028	2.29125	-2.18349	-4.21663	-3.19995	-12.8841	1.47e-05	-0.420929	-5.65592	-0.211473	-26.4813
								Silvopasture	2029	2.29286	-2.58049	-4.98329	-3.78176	-15.2267	1.47e-05	-0.497462	-6.68427	-0.249922	-31.711
								Silvopasture	2030	2.29446	-2.97749	-5.74995	-4.36357	-17.5693	1.47e-05	-0.573995	-7.71262	-0.288372	-36.9408
								Silvopasture	2031	2.29607	-3.37449	-6.51661	-4.94538	-19.9119	1.47e-05	-0.650527	-8.74097	-0.326821	-42.1706
								Silvopasture	2032	2.29768	-3.77149	-7.28327	-5.52719	-22.2544	1.47e-05	-0.72706	-9.76932	-0.365271	-47.4003
								Silvopasture	2033	2.29928	-4.16849	-8.04993	-6.10899	-24.597	1.47e-05	-0.803593	-10.7977	-0.40372	-52.6301
								Silvopasture	2034	2.30089	-4.56549	-8.81659	-6.6908	-26.9396	1.47e-05	-0.880125	-11.826	-0.44217	-57.8599
								Silvopasture	2035	2.3025	-4.96249	-9.58325	-7.27261	-29.2821	1.47e-05	-0.956658	-12.8544	-0.480619	-63.0896
								Silvopasture	2036	2.30412	-5.35949	-10.3499	-7.85442	-31.6247	1.47e-05	-1.03319	-13.8827	-0.519069	-68.3194
								Silvopasture	2037	2.30573	-5.75648	-11.1166	-8.43623	-33.9673	1.47e-05	-1.10972	-14.9111	-0.557518	-73.5491
								Silvopasture	2038	2.30734	-6.15348	-11.8832	-9.01804	-36.3098	1.47e-05	-1.18626	-15.9394	-0.595968	-78.7789
								Silvopasture	2039	2.30896	-6.55048	-12.6499	-9.59985	-38.6524	1.47e-05	-1.26279	-16.9678	-0.634418	-84.0086
								Silvopasture	2040	2.31057	-6.94748	-13.4166	-10.1817	-40.995	1.47e-05	-1.33932	-17.9961	-0.672867	-89.2384
								Silvopasture	2041	2.31219	-7.30478	-14.1065	-10.7053	-46.8514	1.47e-05	-1.4082	-18.9216	-0.707472	-97.6931
								Silvopasture	2042	2.31381	-7.58268	-14.6432	-11.1126	-46.8514	1.47e-05	-1.46177	-19.6415	-0.734386	-99.7137
								Silvopasture	2043	2.31543	-7.78118	-15.0265	-11.4035	-46.8514	1.47e-05	-1.50004	-20.1556	-0.753611	-101.156
								Silvopasture	2044	2.31705	-7.90028	-15.2565	-11.578	-46.8514	1.47e-05	-1.523	-20.4642	-0.765146	-102.021
								Silvopasture	2045	2.31867	-7.93998	-15.3332	-11.6362	-46.8514	1.47e-05	-1.53065	-20.567	-0.768991	-102.309
								Silvopasture	2046	2.3203	-7.93998	-15.3332	-11.6362	-46.8514	1.47e-05	-1.53065	-20.567	-0.768991	-102.307
								Silvopasture	2047	2.32192	-7.93998	-15.3332	-11.6362	-46.8514	1.47e-05	-1.53065	-20.567	-0.768991	-102.305
								Silvopasture	2048	2.32355	-7.93998	-15.3332	-11.6362	-46.8514	1.47e-05	-1.53065	-20.567	-0.768991	-102.304
								Silvopasture	2049	2.32517	-7.93998	-15.3332	-11.6362	-46.8514	1.47e-05	-1.53065	-20.567	-0.768991	-102.302
								Silvopasture	2050	2.3268	-7.93998	-15.3332	-11.6362	-46.8514	1.47e-05	-1.53065	-20.567	-0.768991	-102.301
								Seaweed	2020	23.1733	77.3162	132.729	172.595	61.9301	20.7101	208.059	41.0028	52.5592	790.075
								Seaweed	2021	23.5416	80.7269	132.536	174.975	62.0795	21.2289	209.841	39.3613	53.1245	797.415
								Seaweed	2022	15.4018	54.2815	85.2293	114.238	40.0756	14.0139	136.295	24.3339	34.5802	518.449
								Seaweed	2023	15.6466	56.676	85.1053	115.814	40.1722	14.365	137.463	23.3597	34.9521	523.553
								Seaweed	2024	15.8953	59.1762	84.9815	117.411	40.269	14.7249	138.64	22.4245	35.3281	528.851
								Seaweed	2025	16.1479	61.7867	84.8579	119.03	40.3661	15.0938	139.828	21.5267	35.708	534.345
								Seaweed	2026	16.4046	64.5124	84.7345	120.671	40.4635	15.4719	141.026	20.6649	36.0921	540.041
								Seaweed	2027	16.6653	67.3582	84.6113	122.336	40.561	15.8596	142.234	19.8376	36.4803	545.943
								Seaweed	2028	16.9302	70.3296	84.4882	124.023	40.6588	16.2569	143.453	19.0435	36.8727	552.055
								Seaweed	2029	17.1992	73.4321	84.3653	125.733	40.7568	16.6642	144.681	18.2811	37.2693	558.383
								Seaweed	2030	17.4726	76.6715	84.2426	127.467	40.8551	17.0816	145.921	17.5492	37.6702	564.931
								Seaweed	2031	17.7503	80.0538	84.1201	129.225	40.9536	17.5096	147.171	16.8466	38.0753	571.705
								Seaweed	2032	18.0324	83.5852	83.9978	131.007	41.0524	17.9482	148.432	16.1722	38.4849	578.712
								Seaweed	2033	18.319	87.2725	83.8756	132.814	41.1513	18.3979	149.703	15.5247	38.8988	585.957
								Seaweed	2034	18.6102	91.1224	83.7536	134.645	41.2506	18.8588	150.986	14.9032	39.3172	593.447
								Seaweed	2035	18.906	95.1421	83.6318	136.502	41.35	19.3313	152.279	14.3066	39.7401	601.189
								Seaweed	2036	19.2065	99.3392	83.5102	138.385	41.4497	19.8156	153.584	13.7338	40.1675	609.191
								Seaweed	2037	19.5117	103.721	83.3887	140.293	41.5496	20.312	154.899	13.184	40.5996	617.459
								Seaweed	2038	19.8219	108.297	83.2674	142.228	41.6498	20.8209	156.226	12.6562	41.0362	626.003
								Seaweed	2039	20.1369	113.074	83.1463	144.189	41.7502	21.3425	157.565	12.1495	41.4776	634.831
								Seaweed	2040	20.4569	118.062	83.0254	146.178	41.8509	21.8772	158.914	11.6631	41.9238	643.952
								Seaweed	2041	20.7821	123.271	82.9046	148.194	41.9518	22.4253	160.276	11.1962	42.3747	653.375
								Seaweed	2042	21.1124	128.709	82.7841	150.237	42.053	22.9871	161.649	10.748	42.8305	663.11
								Seaweed	2043	21.448	134.386	82.6637	152.309	42.1544	23.563	163.034	10.3177	43.2911	673.167
								Seaweed	2044	21.7888	140.315	82.5434	154.41	42.256	24.1533	164.43	9.90462	43.7568	683.557
								Seaweed	2045	22.1351	146.504	82.4234	156.539	42.3579	24.7584	165.839	9.5081	44.2274	694.293
								Seaweed	2046	22.487	152.967	82.3035	158.698	42.46	25.3786	167.26	9.12745	44.7031	705.384
								Seaweed	2047	22.8444	159.715	82.1838	160.886	42.5624	26.0144	168.692	8.76204	45.1839	716.845
								Seaweed	2048	23.2074	166.761	82.0643	163.105	42.665	26.6662	170.138	8.41126	45.6699	728.688
								Seaweed	2049	23.5763	174.117	81.9449	165.354	42.7679	27.3342	171.595	8.07452	46.1611	740.926
								Seaweed	2050	23.951	181.798	81.8257	167.635	42.871	28.019	173.065	7.75126	46.6576	753.574
